# Supplementary material
Source: PubMed Central journal article supplement (PMC4589481)
Supplement: NIHMS710817-supplement-1.pdf [file NIHMS710817-supplement-1.pdf]

**Table S1** | EMRinger analysis of selected maps above 5 Å resolution with atomic models. For the transmembrane-only scan of the TrpV1 Channel (EMDB 5778), residues 381-695 of each chain of the deposited model (PDB 3J5P) were used. For EMDB 2787, the two deposited half-models (PDB 4V19, 4V1A) were combined and run as a single model. The top scoring maps have scores above 3.0: the T20S proteasome, which used a crystallographic model with minimal refinement with MDFF<sup>1</sup>, and the hepatitis B viral capsid, which was built *de novo* and refined using real space refinement in Phenix<sup>2</sup>. Both maps are consistently better than 3.5 Å local resolution<sup>3</sup>, likely reflecting the underlying rigidity of the complexes. Recent mammalian ribosome structures<sup>4,5</sup>, which are dynamic and have more variability in resolution, used masking to reconstruct the highest resolution regions. Refmac reciprocal-space refinement of *de novo* atomic models of these components results in EMRinger scores above 1.85<sup>6</sup>.

| <i>EMDB ID</i> | <i>PDB ID</i> | <i>Resolution (Å)</i> | <i>Scannable Model Length</i> | <i>EMRinger Score</i> | <i>Description</i>                                           | <i>Year</i> |
|----------------|---------------|-----------------------|-------------------------------|-----------------------|--------------------------------------------------------------|-------------|
| 5256           | 3IZX          | 3.1                   | 2427                          | 1.54                  | Cytoplasmic Polyhedrosis Virus <sup>7</sup>                  | 2012        |
| 5995           | 3J7H          | 3.2                   | 2616                          | 2.04                  | Beta-Galactosidase <sup>8</sup>                              | 2014        |
| 5160           | 3IYL          | 3.2                   | 5708                          | 2.18                  | Aquareovirus <sup>9</sup>                                    | 2010        |
| 5623           | 3J9I          | 3.2                   | 3439                          | 3.05                  | T20S Proteasome <sup>1</sup>                                 | 2013        |
| 5778           | 3J5P          | 3.27                  | 1484                          | 0.56                  | TrpV1 Channel <sup>10</sup>                                  | 2014        |
| 5778 (TM only) | 3J5P          | 3.27                  | 792                           | 1.17                  | TrpV1 Channel <sup>10</sup>                                  | 2014        |
| 5778 (Refined) | 3J9J          | 3.27                  | 876                           | 2.58                  | TrpV1 Channel                                                | 2015        |
| 2513           | 4CIO          | 3.36                  | 521                           | 1.29                  | F420 reducing hydrogenase <sup>11</sup>                      | 2013        |
| 2787           | 4V19, 4V1A    | 3.4                   | 5326                          | 1.85                  | Mammalian Mitochondrial Ribosome, Large Subunit <sup>5</sup> | 2014        |
| 2762           | 3J7Y          | 3.4                   | 4806                          | 2.09                  | Human Mitochondrial Ribosome Large                           | 2014        |

|      |      |      |      |       | Subunit <sup>4</sup>                                  |      |
|------|------|------|------|-------|-------------------------------------------------------|------|
| 6035 | 3J7W | 3.5  | 1267 | 0.96  | Bacteriophage T7 capsid <sup>12</sup>                 | 2014 |
| 5764 | 3J4U | 3.5  | 1757 | 1.95  | Bordetella bacteriophage <sup>13</sup>                | 2014 |
| 2278 | 3J2V | 3.5  | 366  | 3.26  | Hepatitis B Virus Core <sup>2</sup>                   | 2013 |
| 5925 | 3J6J | 3.6  | 528  | 1.23  | MAVS filament <sup>2</sup>                            | 2014 |
| 2764 | 3J80 | 3.75 | 3060 | 0.9   | 40S-eIF1-eIF1A preinitiation complex <sup>14</sup>    | 2014 |
| 2773 | 4UY8 | 3.8  | 1976 | 0.36  | TnaC stalled E.coli ribosome <sup>15</sup>            | 2014 |
| 5830 | 3J63 | 3.8  | 915  | 1.05  | ASC Pyrin Domain <sup>16</sup>                        | 2014 |
| 6000 | 3J7L | 3.8  | 259  | 2.08  | Brome Mosaic Virus <sup>17</sup>                      | 2014 |
| 2763 | 3J81 | 4    | 3225 | 0.54  | Partial Yeast 48S preinitiation complex <sup>14</sup> | 2014 |
| 5600 | 3J3I | 4.1  | 604  | 0.18  | Penicillium Chrysogenum Virus <sup>18</sup>           | 2014 |
| 2364 | 4BTG | 4.4  | 898  | -0.47 | Bacteriophage phi procapsid <sup>19</sup>             | 2013 |
| 2677 | 4UPC | 4.5  | 235  | -0.41 | Human Gamma-secretase <sup>20</sup>                   | 2014 |
| 2273 | 3ZIF | 4.5  | 7430 | 0.13  | Bovine Adenovirus 3 <sup>21</sup>                     | 2014 |
| 5678 | 3J40 | 4.5  | 1848 | 0.49  | Bacteriophage epsilon15 <sup>22</sup>                 | 2013 |
| 5645 | 3J3X | 4.6  | 4528 | -0.05 | Mm Chaperonin, Training <sup>23</sup>                 | 2013 |
| 5895 | 3J6E | 4.7  | 4705 | 0.09  | GMPCPP Microtubule <sup>24</sup>                      | 2014 |
| 5646 | 3J3X | 4.7  | 4528 | 0.55  | Mm Chaperonin, Testing <sup>23</sup>                  | 2013 |
| 2788 | 4V1W | 4.7  | 2976 | 1.27  | Horse spleen apoferritin <sup>25</sup>                | 2014 |
| 5391 | 3J1B | 4.9  | 4816 | 0.2   | apo rATcpn-alpha <sup>26</sup>                        | 2013 |

|      |      |   |      |       |                                            |      |
|------|------|---|------|-------|--------------------------------------------|------|
| 6187 | 3J8X | 5 | 737  | -0.71 | Empty Microtubule/Kinesin <sup>27</sup>    | 2014 |
| 6188 | 3J8Y | 5 | 744  | -0.16 | ADP-AIF3 Microtubule/Kinesin <sup>27</sup> | 2014 |
| 5896 | 3J6F | 5 | 4706 | 0.06  | GDP microtubule <sup>24</sup>              | 2014 |
| 5886 | 3J69 | 5 | 579  | 0.8   | nanobody/poliovirus <sup>28</sup>          | 2014 |

### **Supplemental References**

- 1 Li, X. *et al.* Electron counting and beam-induced motion correction enable near-atomic-resolution single-particle cryo-EM. *Nature methods* **10**, 584-590, doi:10.1038/nmeth.2472 (2013).
- 2 Yu, X., Jin, L., Jih, J., Shih, C. & Zhou, Z. H. 3.5Å cryoEM structure of hepatitis B virus core assembled from full-length core protein. *PLoS one* **8**, e69729, doi:10.1371/journal.pone.0069729 (2013).
- 3 Kucukelbir, A., Sigworth, F. J. & Tagare, H. D. Quantifying the local resolution of cryo-EM density maps. *Nature methods* **11**, 63-65, doi:10.1038/nmeth.2727 (2014).
- 4 Brown, A. *et al.* Structure of the large ribosomal subunit from human mitochondria. *Science* **346**, 718-722, doi:10.1126/science.1258026 (2014).
- 5 Greber, B. J. *et al.* The complete structure of the large subunit of the mammalian mitochondrial ribosome. *Nature* **515**, 283-286, doi:10.1038/nature13895 (2014).
- 6 Brown, A. *et al.* Tools for macromolecular model building and refinement into electron cryo-microscopy reconstructions. *Acta Crystallographica Section D* **71**, 136-153, doi:10.1107/S1399004714021683 (2015).
- 7 Yu, X., Ge, P., Jiang, J., Atanasov, I. & Zhou, Z. H. Atomic model of CPV reveals the mechanism used by this single-shelled virus to economically carry out functions conserved in multishelled reoviruses. *Structure* **19**, 652-661, doi:10.1016/j.str.2011.03.003 (2011).
- 8 Bartesaghi, A., Matthies, D., Banerjee, S., Merk, A. & Subramaniam, S. Structure of beta-galactosidase at 3.2-Å resolution obtained by cryo-electron microscopy. *Proceedings of the National Academy of Sciences of the United States of America* **111**, 11709-11714, doi:10.1073/pnas.1402809111 (2014).
- 9 Zhang, X., Jin, L., Fang, Q., Hui, W. H. & Zhou, Z. H. 3.3 Å cryo-EM structure of a nonenveloped virus reveals a priming mechanism for cell entry. *Cell* **141**, 472-482, doi:10.1016/j.cell.2010.03.041 (2010).
- 10 Liao, M., Cao, E., Julius, D. & Cheng, Y. Structure of the TRPV1 ion channel determined by electron cryo-microscopy. *Nature* **504**, 107-112, doi:10.1038/nature12822 (2013).
- 11 Allegretti, M., Mills, D. J., McMullan, G., Kuhlbrandt, W. & Vonck, J. Atomic model of the F420-reducing [NiFe] hydrogenase by electron cryo-microscopy using a direct electron detector. *eLife* **3**, e01963, doi:10.7554/eLife.01963 (2014).

- 12 Guo, F. *et al.* Capsid expansion mechanism of bacteriophage T7 revealed by multistate atomic models derived from cryo-EM reconstructions. *Proceedings of the National Academy of Sciences of the United States of America* **111**, E4606-4614, doi:10.1073/pnas.1407020111 (2014).
- 13 Zhang, X. *et al.* A new topology of the HK97-like fold revealed in Bordetella bacteriophage by cryoEM at 3.5 Å resolution. *eLife* **2**, e01299, doi:10.7554/eLife.01299 (2013).
- 14 Hussain, T. *et al.* Structural changes enable start codon recognition by the eukaryotic translation initiation complex. *Cell* **159**, 597-607, doi:10.1016/j.cell.2014.10.001 (2014).
- 15 Bischoff, L., Berninghausen, O. & Beckmann, R. Molecular basis for the ribosome functioning as an L-tryptophan sensor. *Cell reports* **9**, 469-475, doi:10.1016/j.celrep.2014.09.011 (2014).
- 16 Lu, A. *et al.* Unified polymerization mechanism for the assembly of ASC-dependent inflammasomes. *Cell* **156**, 1193-1206, doi:10.1016/j.cell.2014.02.008 (2014).
- 17 Wang, Z. *et al.* An atomic model of bromo mosaic virus using direct electron detection and real-space optimization. *Nature communications* **5**, 4808, doi:10.1038/ncomms5808 (2014).
- 18 Luque, D. *et al.* Cryo-EM near-atomic structure of a dsRNA fungal virus shows ancient structural motifs preserved in the dsRNA viral lineage. *Proceedings of the National Academy of Sciences of the United States of America* **111**, 7641-7646, doi:10.1073/pnas.1404330111 (2014).
- 19 Nemecek, D. *et al.* Subunit folds and maturation pathway of a dsRNA virus capsid. *Structure* **21**, 1374-1383, doi:10.1016/j.str.2013.06.007 (2013).
- 20 Lu, P. *et al.* Three-dimensional structure of human gamma-secretase. *Nature* **512**, 166-170, doi:10.1038/nature13567 (2014).
- 21 Cheng, L. *et al.* Cryo-EM structures of two bovine adenovirus type 3 intermediates. *Virology* **450-451**, 174-181, doi:10.1016/j.virol.2013.12.012 (2014).
- 22 Baker, M. L. *et al.* Validated near-atomic resolution structure of bacteriophage epsilon15 derived from cryo-EM and modeling. *Proceedings of the National Academy of Sciences of the United States of America* **110**, 12301-12306, doi:10.1073/pnas.1309947110 (2013).
- 23 DiMaio, F., Zhang, J., Chiu, W. & Baker, D. Cryo-EM model validation using independent map reconstructions. *Protein science : a publication of the Protein Society* **22**, 865-868, doi:10.1002/pro.2267 (2013).
- 24 Alushin, G. M. *et al.* High-resolution microtubule structures reveal the structural transitions in alpha-tubulin upon GTP hydrolysis. *Cell* **157**, 1117-1129, doi:10.1016/j.cell.2014.03.053 (2014).
- 25 Russo, C. J. & Passmore, L. A. Electron microscopy: Ultrastable gold substrates for electron cryomicroscopy. *Science* **346**, 1377-1380, doi:10.1126/science.1259530 (2014).
- 26 Zhang, K. *et al.* Flexible interwoven termini determine the thermal stability of thermosomes. *Protein & cell* **4**, 432-444, doi:10.1007/s13238-013-3026-9 (2013).

- 27 Shang, Z. *et al.* High-resolution structures of kinesin on microtubules provide a basis for nucleotide-gated force-generation. *eLife* **3**, doi:10.7554/eLife.04686 (2014).
- 28 Schotte, L. *et al.* Mechanism of action and capsid-stabilizing properties of VHHs with an in vitro antipoliioviral activity. *Journal of virology* **88**, 4403-4413, doi:10.1128/JVI.03402-13 (2014).
- 29 DiMaio, F. *et al.* Atomic-accuracy models from 4.5-Å cryo-electron microscopy data with density-guided iterative local refinement. *Nature methods* **12**, 361-365, doi:10.1038/nmeth.3286 (2015).
